CORRECTION

## Correction: A novel *badnavirus* discovered from *Betula sp.* affected by *birch leaf-roll disease*

The PLOS ONE Staff

In the title of this article, “badnavirus” and “birch leaf-roll disease” were incorrectly italicized. The correct title is: A novel badnavirus discovered from *Betula sp.* affected by birch leaf-roll disease. The correct citation is: Rumbou A, Candresse T, Marais A, Theil S, Langer J, Jalkanen R, et al. (2018) A novel badnavirus discovered from *Betula sp.* affected by birch leaf-roll disease. PLoS ONE 13(3): e0193888. <https://doi.org/10.1371/journal.pone.0193888>.

The publisher apologizes for the error.

### Reference

1. Rumbou A, Candresse T, Marais A, Theil S, Langer J, Jalkanen R, et al. (2018) A novel *badnavirus* discovered from *Betula sp.* affected by *birch leaf-roll disease*. PLoS ONE 13(3): e0193888. <https://doi.org/10.1371/journal.pone.0193888> PMID: 29494687

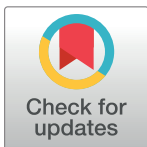

### OPEN ACCESS

**Citation:** The PLOS ONE Staff (2018) Correction: A novel *badnavirus* discovered from *Betula sp.* affected by *birch leaf-roll disease*. PLoS ONE 13(7): e0200555. <https://doi.org/10.1371/journal.pone.0200555>

**Published:** July 6, 2018

**Copyright:** © 2018 The PLOS ONE Staff. This is an open access article distributed under the terms of the [Creative Commons Attribution License](https://creativecommons.org/licenses/by/4.0/), which permits unrestricted use, distribution, and reproduction in any medium, provided the original author and source are credited.
